# Supplementary material for: Comparing Methods for Handling Missing Cost and Outcome Data in Clinical Trial-based Cost-effectiveness Analysis
Source: Research Square preprint supplement (doi:10.21203/rs.3.rs-479996/v2), 2021-09-01
Supplement: Supplementary file 1 [file 1ca8e879f6fb373dd129e030.docx]

Table S1: Missingness mechanism in EQ5D
